# Supplementary material for: Synthesis of high-density jet fuel from plastics via catalytically integral processes
Source: Royal Society of Chemistry journal article supplement (doi:10.1039/c5ra25327f), 2016-01-01
Supplement: c5ra25327f1.pdf [file c5ra25327f1.pdf]

Supplementary information

**Synthesis of high-density jet fuel from plastics via catalytically integral processes**

Xuesong Zhang, and Hanwu Lei\*

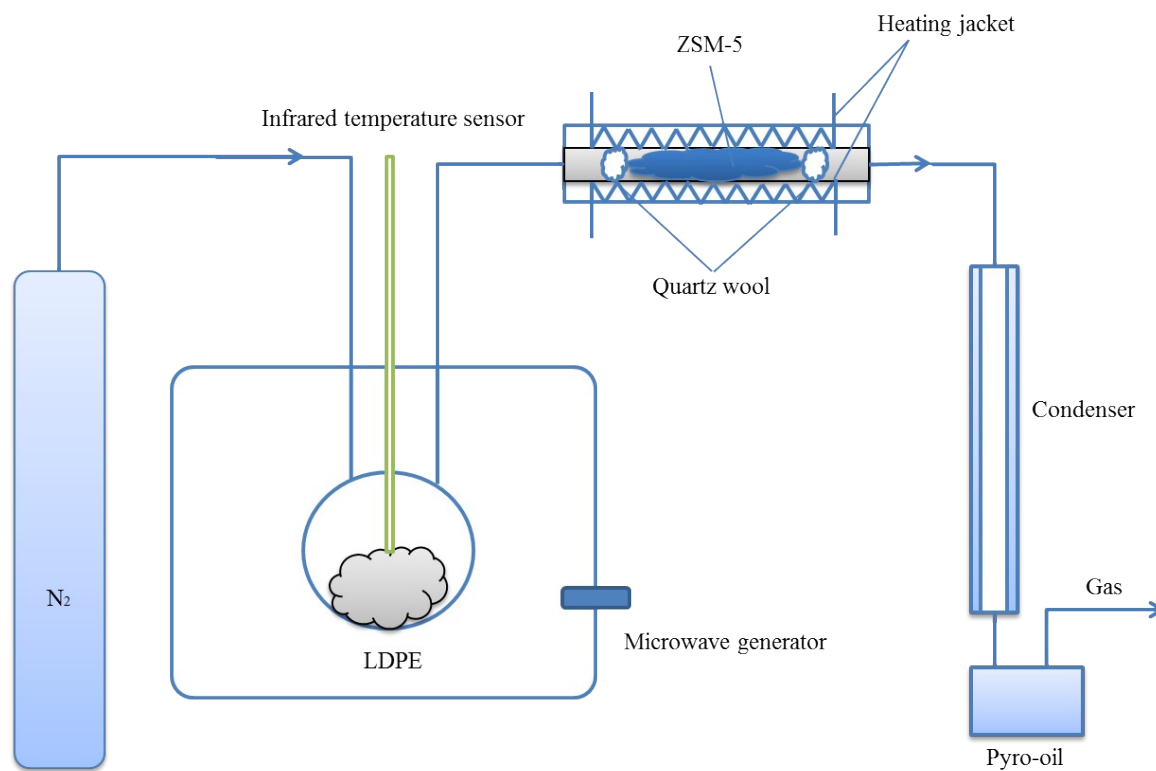

**Fig. S1** The schematic diagram of the microwave-assisted degradation system integrated with catalysis process

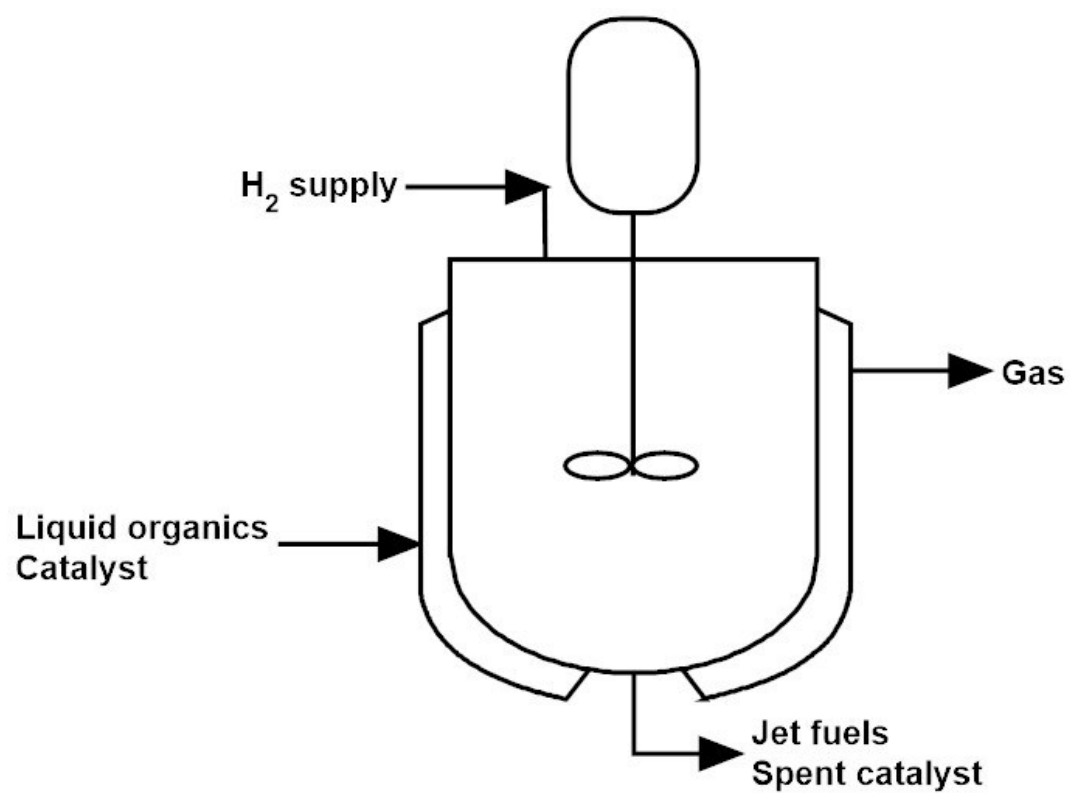

**Fig. S2** The schematic overview of the hydrotreating process set-up
